# Supplementary material
Source: Springer Nature journal article supplement (https://www.springermedizin.de/resource/supplementary/12936_2009_861_MOESM4_ESM.pdf/9548402)

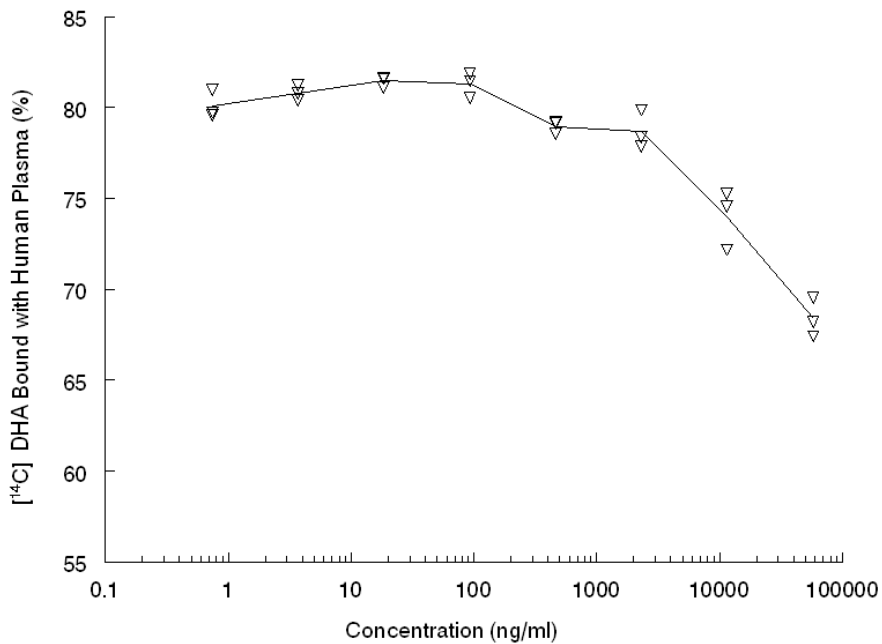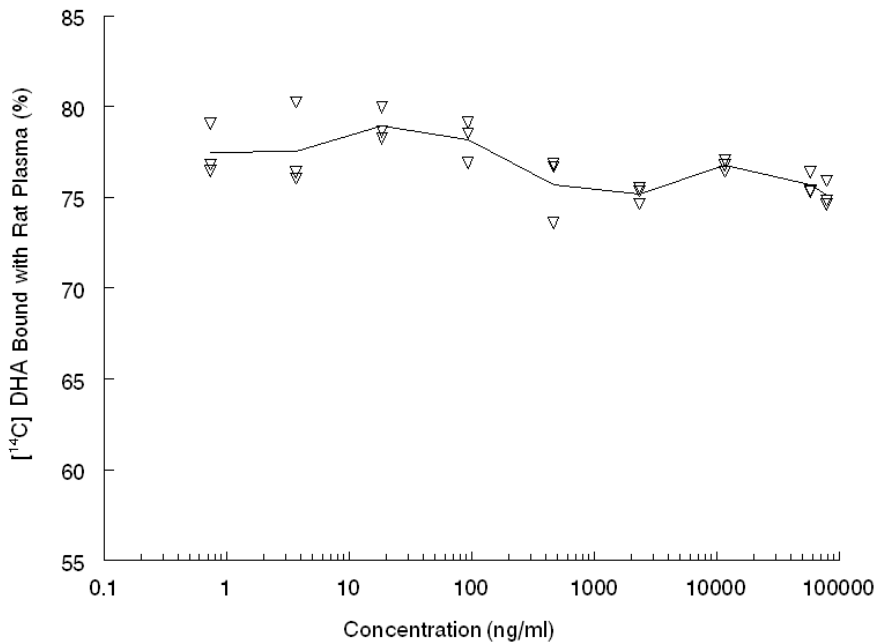

Supplement: MOESM4 [file 9548402]
